# Supplementary material for: Construction of Fe-doped ZIF-8/DOX nanocomposites for ferroptosis strategy in the treatment of breast cancer
Source: Royal Society of Chemistry journal article supplement (doi:10.1039/d3tb00749a), 2023-01-01
Supplement: d3tb00749a1.pdf [file d3tb00749a1.pdf]

## Electronic Supplementary Information

### Table of contents

|                                                                          |    |
|--------------------------------------------------------------------------|----|
| 1. Chemical reagents and IR spectrum of ZIF-8, 5FZ, 7FZ and DOX@7FZ..... | S2 |
| 2. Size and potential values of ZIF-8, 5FZ, 7FZ and 15FZ.....            | S3 |
| 3. XPS spectrum 5FZ and 7FZ.....                                         | S3 |
| 4. Color of various yields.....                                          | S4 |
| 5. Western blot analysis and the matching quantitative data.....         | S5 |
| 6. FT-IR spectra of ZIF-8, 5FZ, 7FZ and<br>DOX@7FZ.....                  | S5 |

Table S1. Table of chemical reagents.

| Name of reagent           | Purity of reagent | Manufacture               |
|---------------------------|-------------------|---------------------------|
| Methanol                  | A. R.             | Aladdin (Shanghai, China) |
| 2-methylimidazole         | A. R.             | Aladdin (Shanghai, China) |
| Zinc nitrate hexahydrate  | A. R.             | Aladdin (Shanghai, China) |
| Iron sulfate heptahydrate | A. R.             | Aladdin (Shanghai, China) |
| Doxorubicin hydrochloride | Medical grade     | Aladdin (Shanghai, China) |
| PBS                       | A. R.             | Solarbio (Beijing, China) |
| NaOH                      | A. R.             | Aladdin (Shanghai, China) |

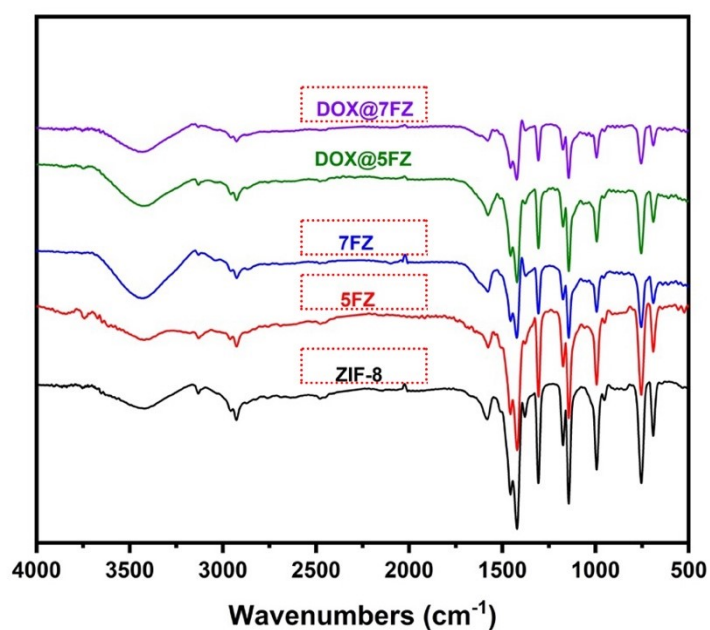

Figure S1. FT-IR spectra of ZIF-8, 5FZ, 7FZ and DOX@7FZ.

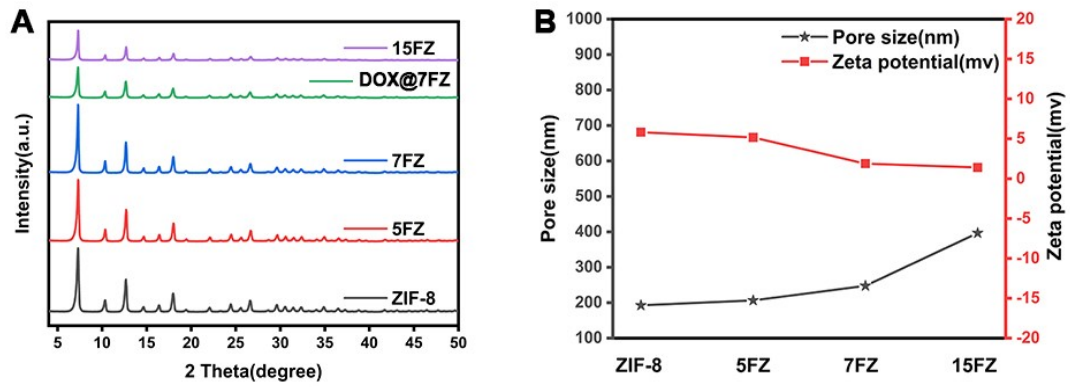

Figure S2. The hydrodynamic diameter and zeta potential values of ZIF-8, 5FZ, 7FZ, and 15FZ.

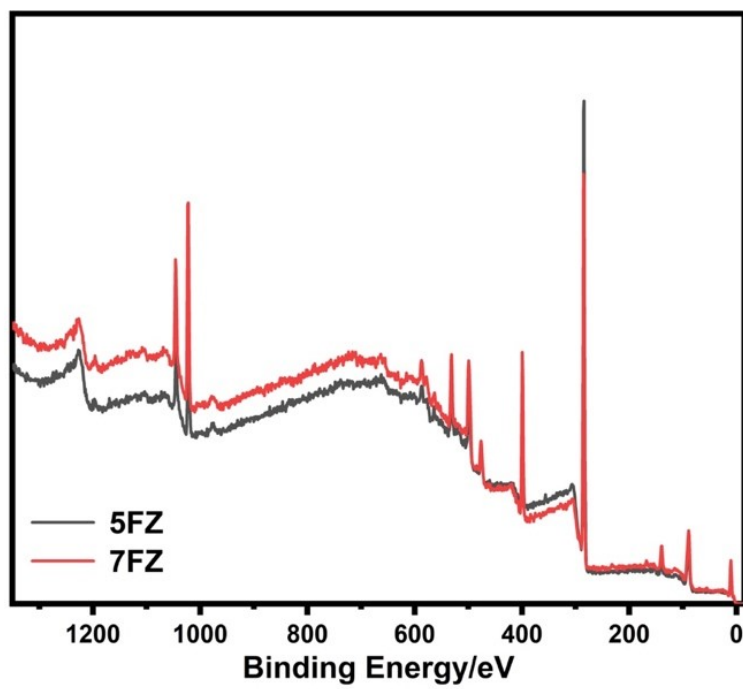

Fig. S3 XPS wide scan spectra of 5FZ and 7FZ.

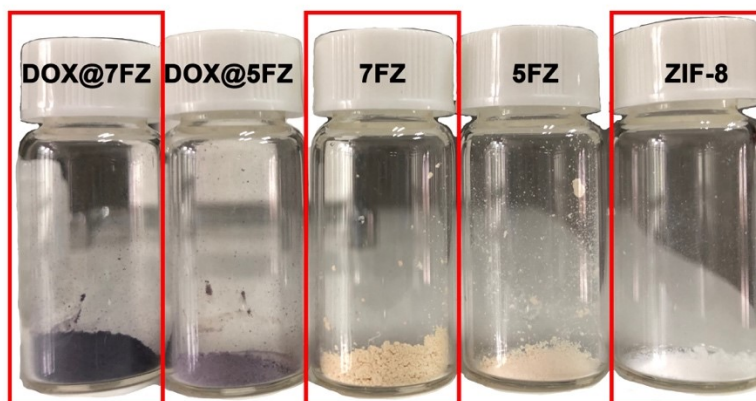

Figure S4 Color of various yields.

Table S1 The Fe valances of the as-prepared  $x\%$  Fe-ZIF-8 powders

| $x\%$ Fe-ZIF-8 | Peaks     | Fe/valance                 |
|----------------|-----------|----------------------------|
| 5FZ            | 712.12 eV | Fe (III) 2p <sub>3/2</sub> |
|                | 722.13 eV | Fe(II) 2p <sub>1/2</sub>   |
|                | 726.96 eV | Fe(III) 2p <sub>1/2</sub>  |
| 7FZ            | 712.13 eV | Fe (III) 2p <sub>3/2</sub> |
|                | 722.03 eV | Fe(II) 2p <sub>1/2</sub>   |
|                | 725.98 eV | Fe(III) 2p <sub>1/2</sub>  |

Table S2 The BET data for the different samples

| Samples | S <sub>BET</sub> (m <sup>2</sup> /g) |
|---------|--------------------------------------|
| ZIF-8   | 2303                                 |
| 5FZ     | 1271                                 |
| 7FZ     | 1206                                 |

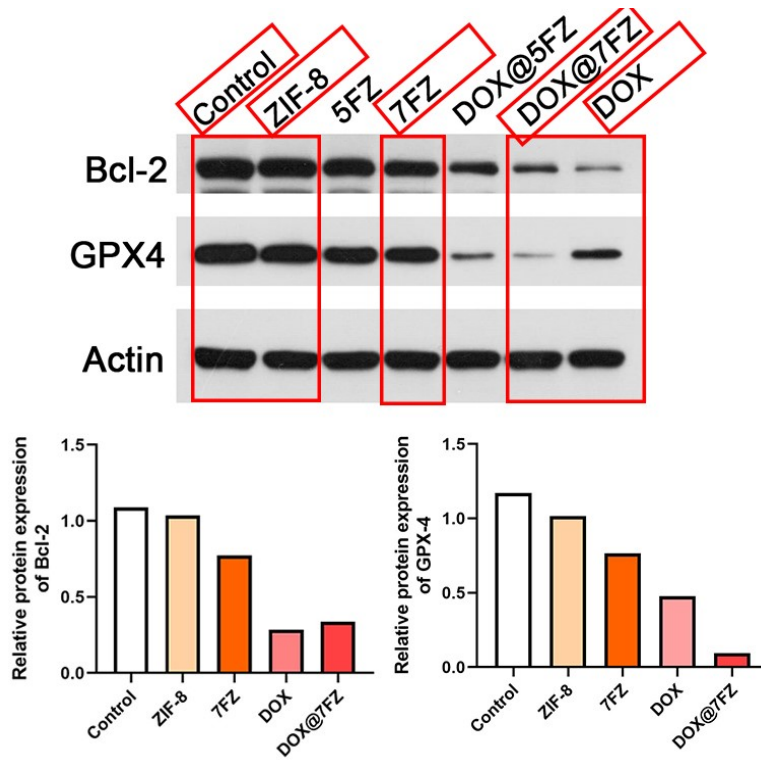

Figure S5. Western blot analysis and the matching quantitative data of Bcl-2 and GPX4 in MCF-7 cells with various treatments after 24h as indicated.  $\beta$ -actin (noted as Actin) was set as a control.

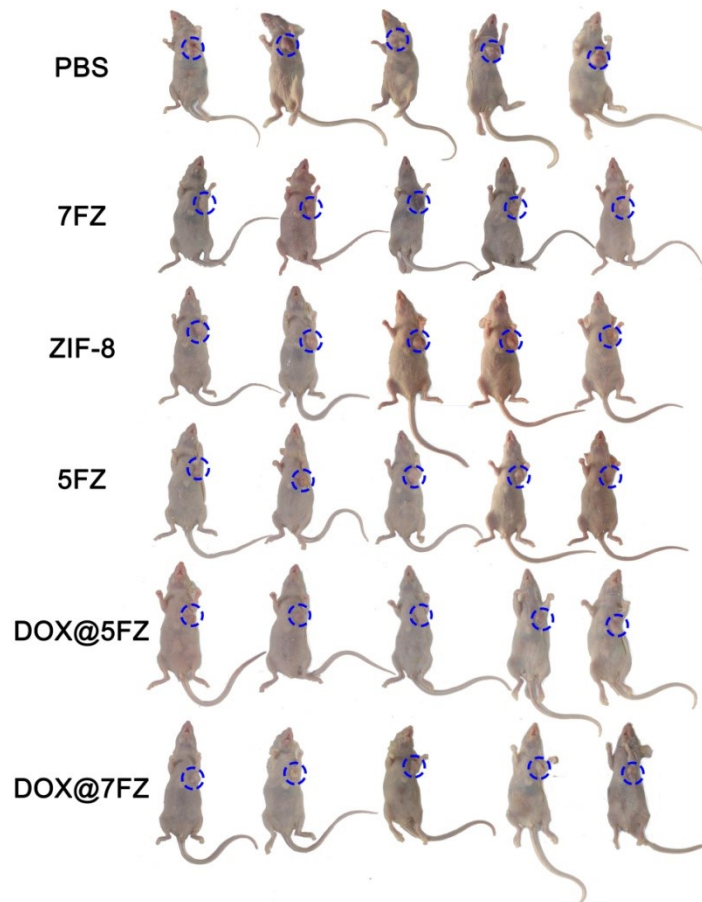

Fig. S6 the tumor volume of different groups and control group.

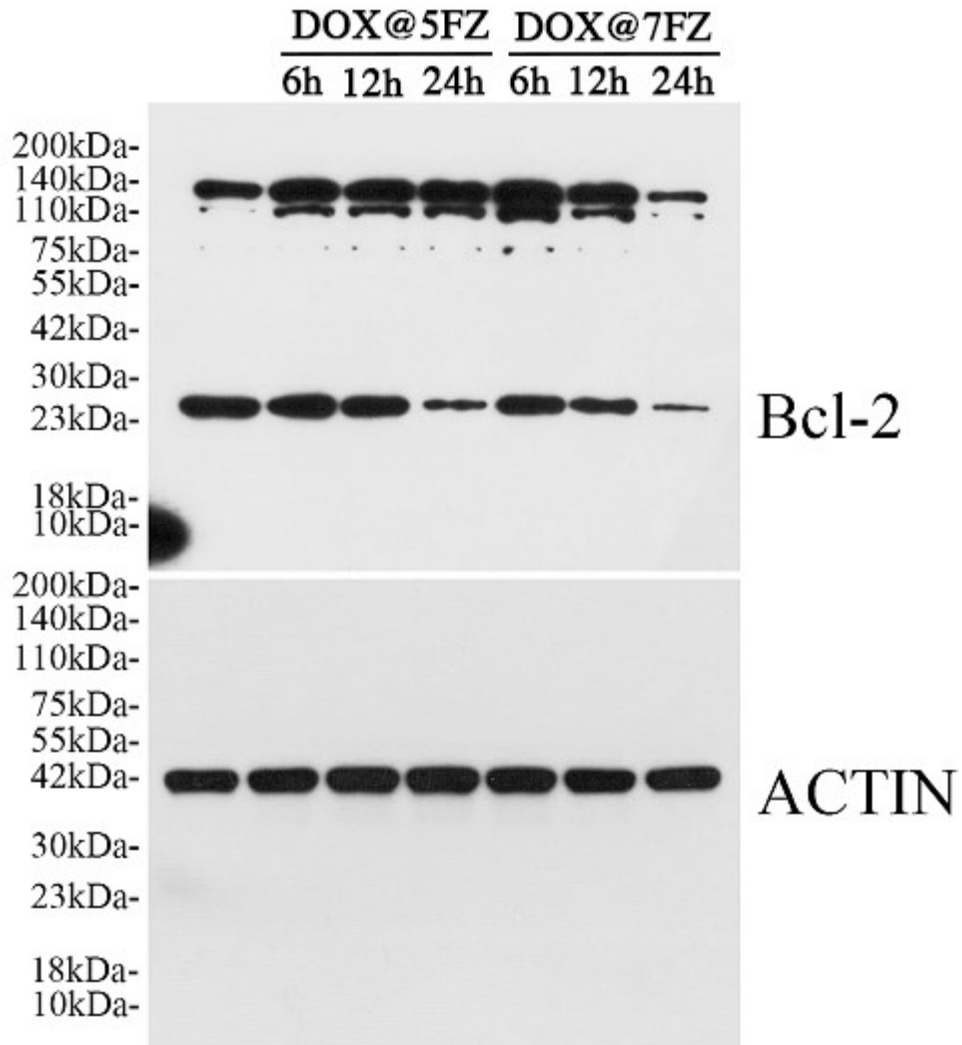

Fig. S7 Western blot analysis data of Bcl-2.

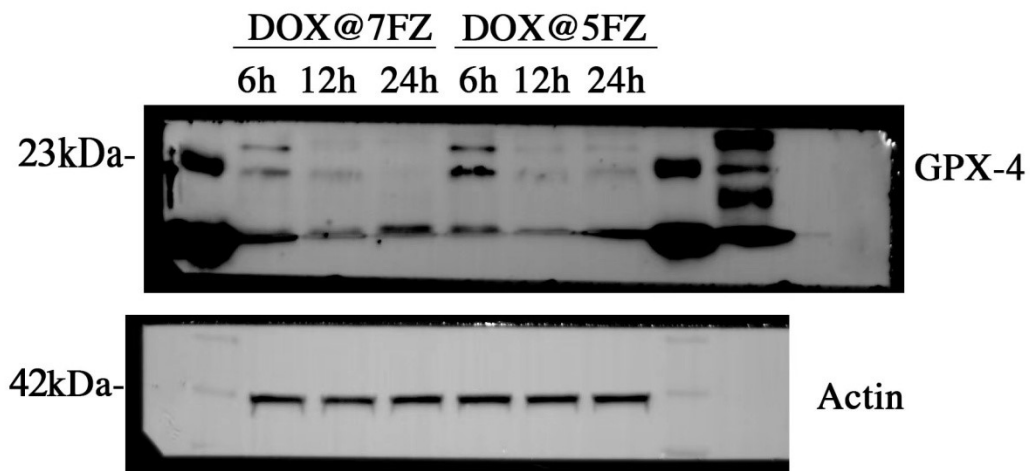

Fig. S8 Western blot analysis data of GPX-4.

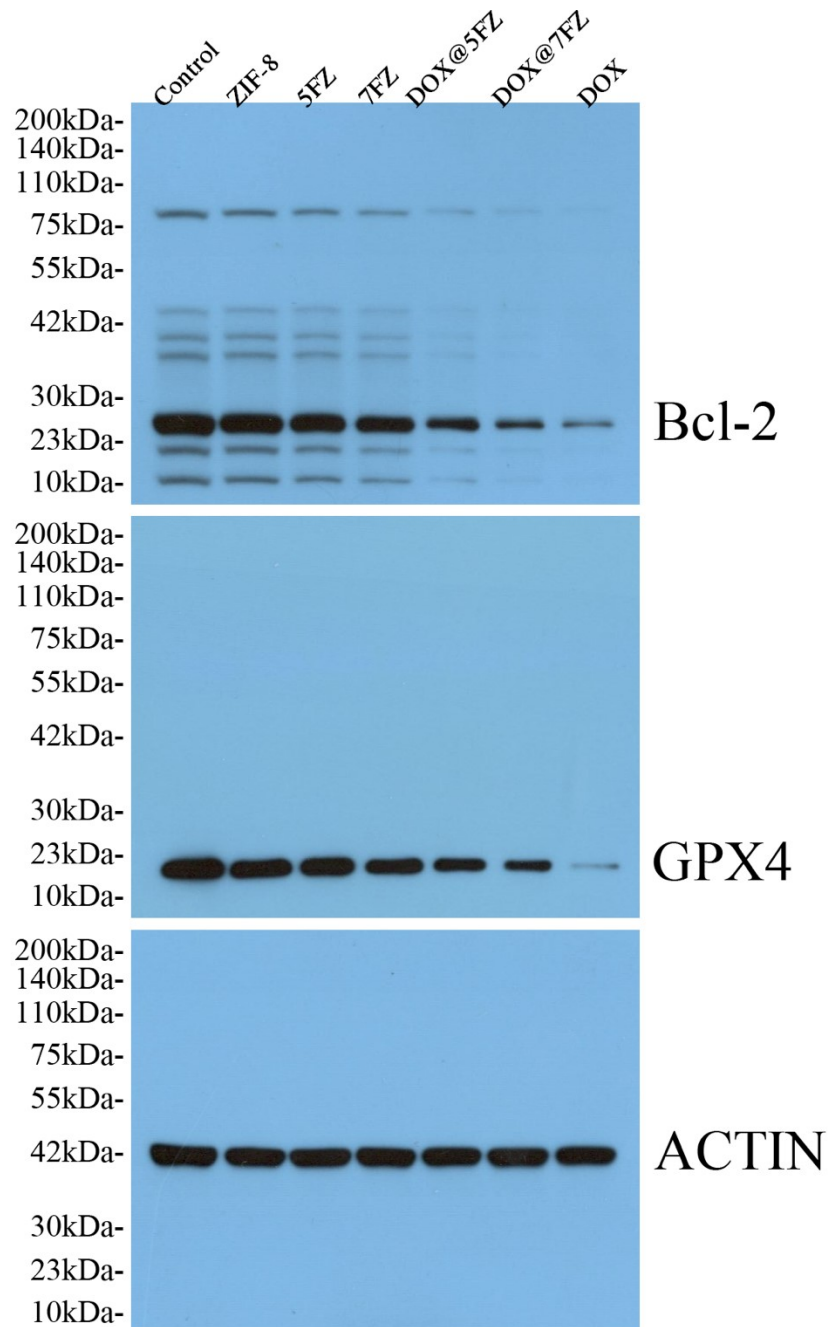

Fig. S9 Western blot analysis data of Bcl-2 and GPX4 in MCF-7 cells with various treatments after 24h as indicated.  $\beta$ -actin (noted as Actin) was set as a control.
